# Supplementary material for: Longitudinal neuroanatomical and behavioral analyses show phenotypic drift and variability in the Ts65Dn mouse model of Down syndrome
Source: Oxford University Press journal article supplement (doi:10.1242/dmm.046243), 2020-08-17
Supplement: dmm046243supp.pdf [file dmm046243supp.pdf]

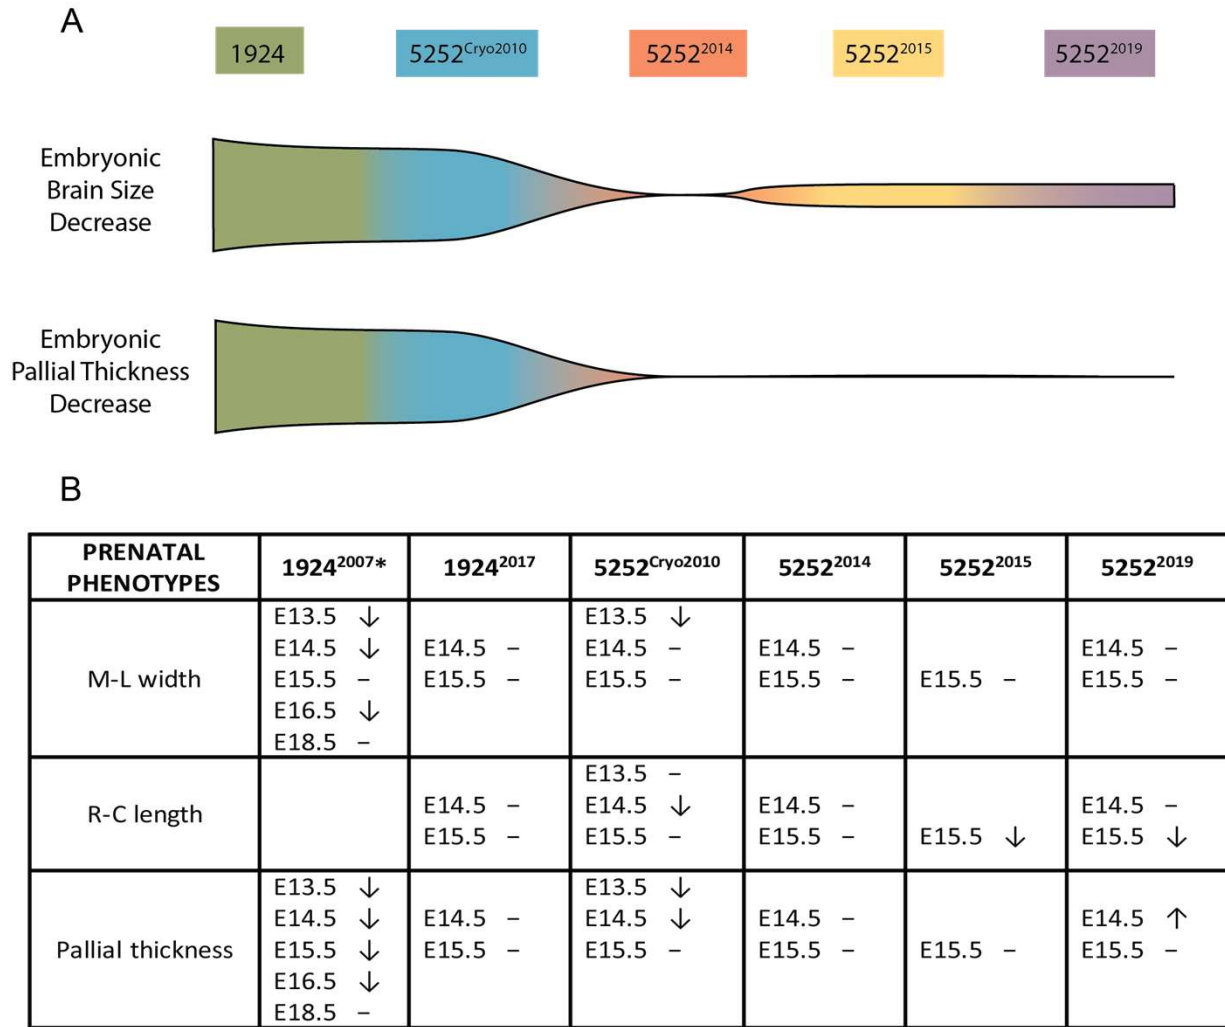

**Figure S1. Summary of embryonic phenotypes.** **A)** Graphical representation shows the change of phenotypes measured over time with thicker width indicating a more severe phenotype present while thinner lines denoting minimal or absent phenotype. **B)** Table shows summary of findings from embryonic characterization of both 1924 and 5252 lines of Ts65Dn with ↓ indicating a decrease, ↑ indicating an increase, and – indicating no difference between trisomic and euploid controls.

\*Summary of previous findings (Chakrabarti *et al.* 2007)

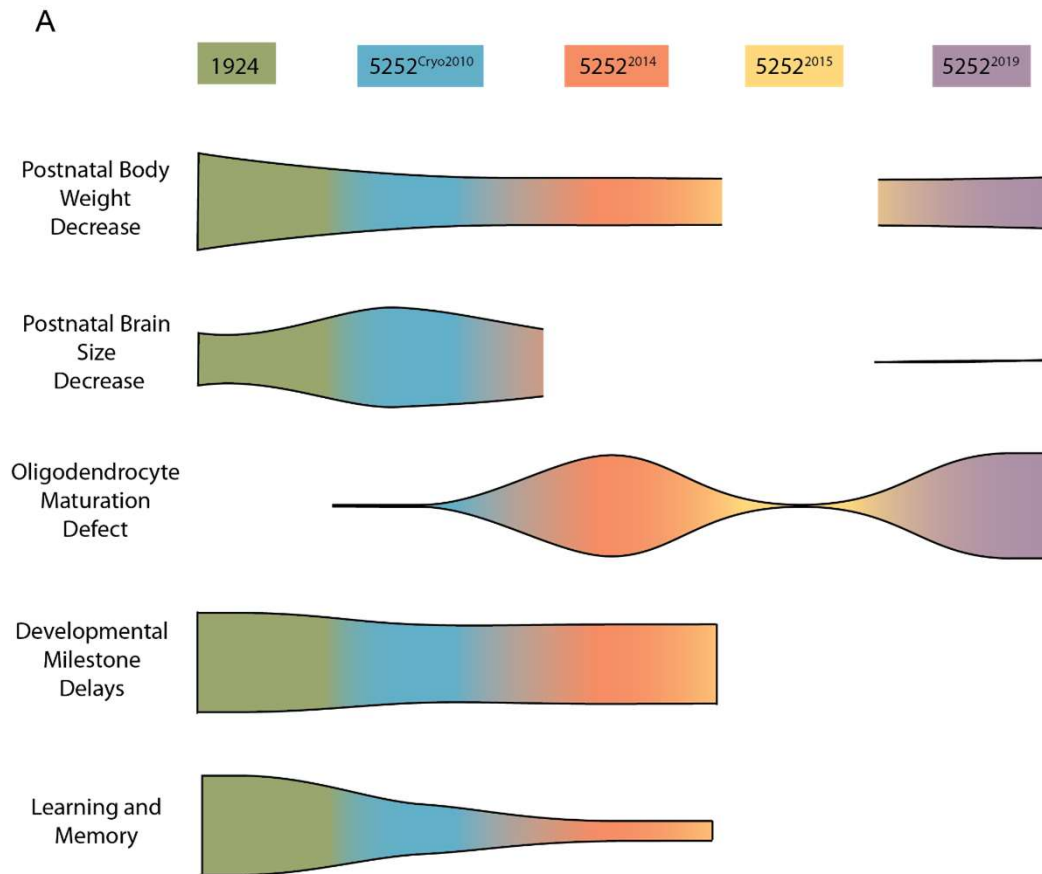

**B**

| POSTNATAL PHENOTYPES                | 1924*                        | 5252 <sup>Cryo2010</sup>         | 5252 <sup>2014**</sup>     | 5252 <sup>2015</sup>    | 5252 <sup>2019</sup>        |
|-------------------------------------|------------------------------|----------------------------------|----------------------------|-------------------------|-----------------------------|
| Body weight                         | P15 ↓<br>P30 ↓<br>P60 ↓      | P15 ↓<br>P30 ↓<br>P60 -          | P15 ↓<br>P21 ↓             |                         | P15 ↓<br>P30 ↓<br>P60 -     |
| Brainsize                           | P15 - Weight<br>P45 ↓ Weight | P15 ↓ R-C<br>P30 ↓ R-C<br>P60 -  |                            |                         | P15 -<br>P30 -<br>P60 ↓ M-L |
| Hindlimb reflex                     |                              | P15 -<br>P30 -<br>P60 -          | P90 ↓                      |                         | P15 ↓<br>P30 ↓<br>P60 ↓     |
| Hippocampal CA1/CA3 cell density    | P90 -                        | P60 -                            |                            | P60 -                   | P60 -                       |
| Cerebellar cell density             | P35 ↓<br>P120 ↓              | P60 -                            |                            | P60 -                   | P60 -                       |
| Oligodendrocyte maturation          |                              | P15 -<br>P21 -<br>P30 -<br>P60 - | P15 ↓<br>P30 -<br>P60 ↓    | P15 -<br>P21 -<br>P60 - | P15 -<br>P30 ↓<br>P60 ↓     |
| Myelin-related gene expression      |                              | P30 -                            | P30 ↓ MBP/MAG (protein)    |                         | P30 ↓ MBP                   |
| Developmental milestone acquisition | 8/10 ↓                       | 6/10 ↓                           | 6/10 ↓                     |                         |                             |
| Learning and memory                 | ↓ Hidden<br>↓ Reversal       | P60 ↓ Hidden                     | P60 - Hidden<br>↓ Reversal |                         |                             |

**Figure S2. Summary of postnatal phenotypes.** **A)** Illustration represents the change of measured phenotypes across various cohorts of Ts65Dn with thicker line widths indicating more severe phenotypes while thinner lines represent minimal or no phenotype present. **B)** Table shows summary of findings from postnatal characterization of Ts65Dn↓ indicating a decrease or delay, ↑ indicating increase or improvement, and - indicating no difference between trisomic and euploid controls.

\*Summary of previous findings in 1924 line (Reeves *et al.* 1995; Sago *et al.* 2004; Roper *et al.* 2006; Bianchi *et al.* 2010; Lorenzi & Reeves 2006; Baxter *et al.* 2000; Toso *et al.* 2008; Holtzman *et al.* 1996)

\*\*Summary of previous findings in the 5252 line (Olmos-Serrano *et al.* 2016a,b; Aziz *et al.* 2018)

|                            | Euploid Male |      | 5252 <sup>Cryo2010</sup> Male |       | Euploid Female |      | 5252 <sup>Cryo2010</sup> Female |       |
|----------------------------|--------------|------|-------------------------------|-------|----------------|------|---------------------------------|-------|
|                            | Avg.         | Var. | Avg.                          | Var.  | Avg.           | Var. | Avg.                            | Var.  |
| <b>Cliff Aversion</b> *    | 5.35         | 5.53 | 7.2                           | 17.16 | 4.1            | 2.09 | 6.83                            | 9.81  |
| <b>Ear Twitch</b> *        | 11.7         | 2.01 | 12.73                         | 1.80  | 11.8           | 1.56 | 12.33                           | 2.06  |
| <b>Forelimb Grasp</b>      | 11.63        | 3.73 | 12.33                         | 3.22  | 12.08          | 4.38 | 13.4                            | 19.44 |
| <b>Air Righting</b>        | 13.05        | 1.35 | 14.13                         | 3.98  | 12.35          | 4.43 | 13.66                           | 5.89  |
| <b>Open Field</b> *        | 11.55        | 2.15 | 13.0                          | 4.0   | 11.1           | 1.39 | 12.17                           | 2.81  |
| <b>Eye Opening</b> *       | 13.0         | 0.4  | 14.27                         | 2.6   | 13.0           | 0.6  | 13.33                           | 1.10  |
| <b>Negative Geotaxis</b> * | 5.0          | 3.2  | 10.6                          | 20.11 | 4.6            | 0.84 | 6.83                            | 22.64 |
| <b>Rooting</b>             | 7.1          | 9.49 | 8.0                           | 16.67 | 5.25           | 3.89 | 6.17                            | 3.47  |
| <b>Auditory Startle</b>    | 16.95        | 1.85 | 16.6                          | 9.57  | 15.8           | 3.56 | 17.08                           | 2.24  |
| <b>Surface Righting</b> *  | 6.0          | 3.5  | 7.6                           | 3.71  | 6.75           | 4.39 | 8.0                             | 2.5   |

**Table S1. Developmental milestone statistics.** Table shows summary statistics for the developmental milestones from the 5252<sup>Cryo2010</sup> line.

\*Indicates milestone that was significantly delayed in acquisition for 5252<sup>Cryo2010</sup> mice.
